# Supplementary material
Source: ML conference proceedings conference paper supplement (https://openaccess.thecvf.com/content/ICCV2023/html/Li_RenderIH_A_Large-Scale_ICCV_2023_paper.html)
Supplement: Supplementary file 2 [file Li_RenderIH_A_Large-Scale_ICCV_2023_supplemental.zip]

Archive with 2 entries (2 files):
- 09708-supp.pdf
- video_vis.mp4
